# Supplementary material for: Glucuronidation as a metabolic barrier against zearalenone in rat everted intestine
Source: PubMed Central journal article supplement — J Vet Med Sci. 2019 Dec 16;82(2):153–61. doi: 10.1292/jvms.19-0570 (PMC7041979; doi:10.1292/jvms.19-0570), 2019-12-16
Supplement: jvms-82-153-s001.pdf [file jvms-82-153-s001.pdf]

**Fig. S1**

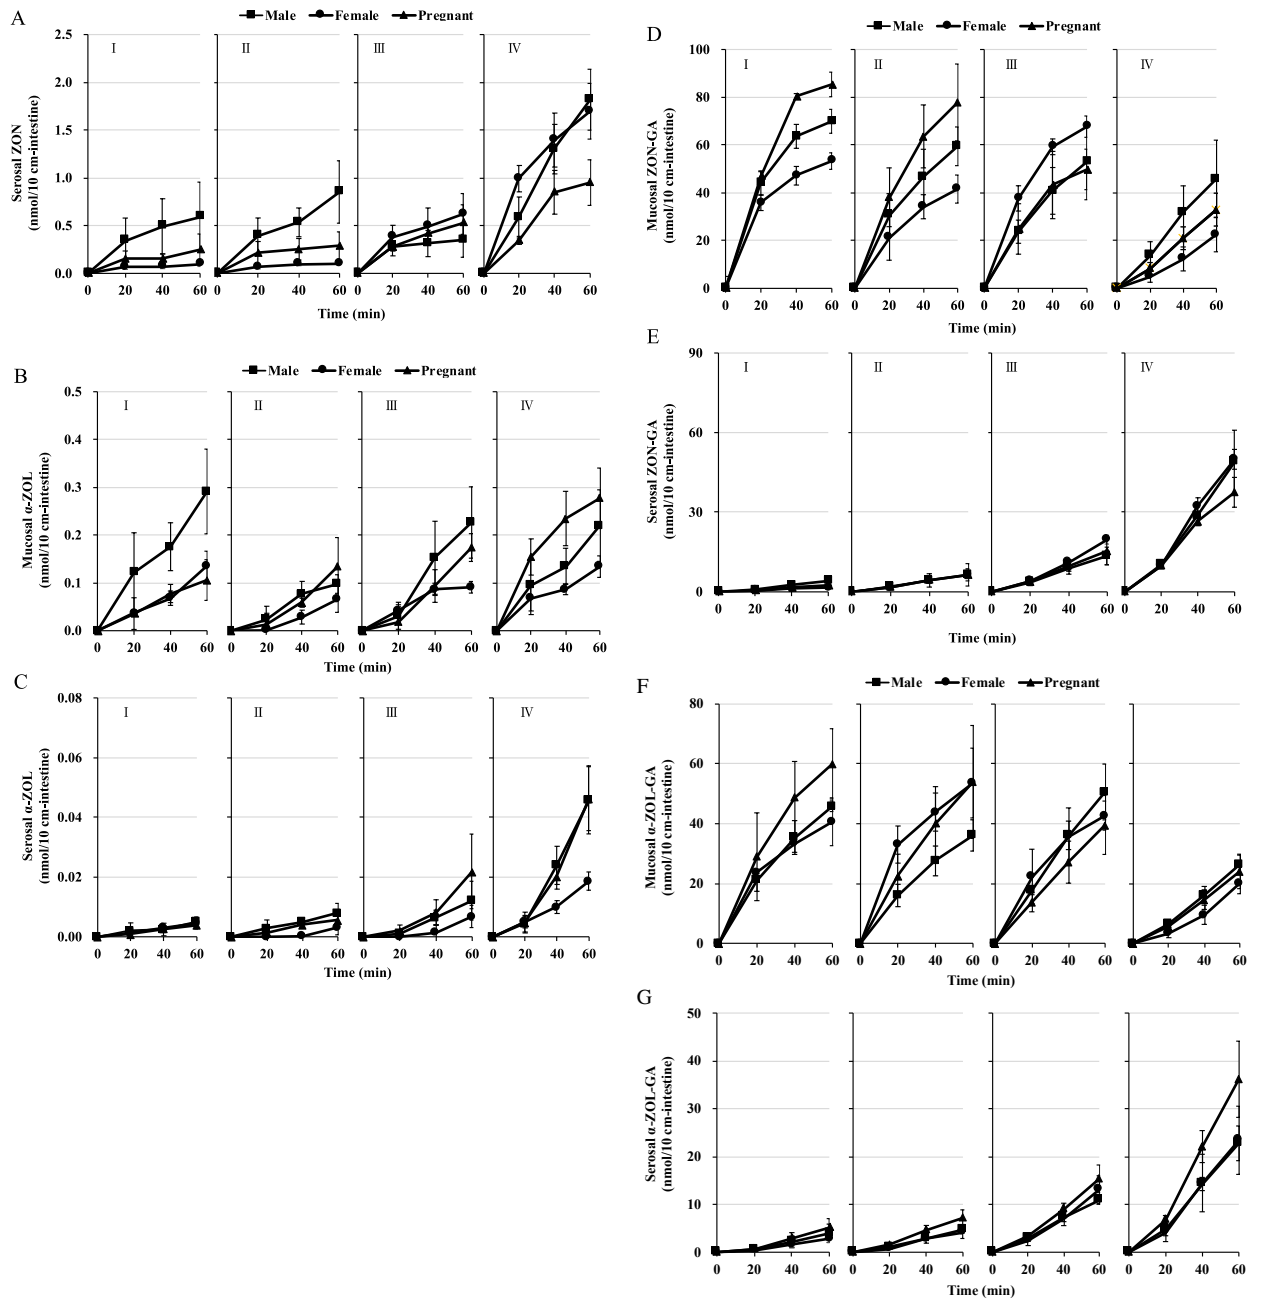

**Figure S1. Transition of zearalenone and its metabolites every 20 min in rat everted intestine**

The resulting zearalenone (ZON) (A) and its metabolites ( $\alpha$ -zearalenol [B] and [C]; zearalenone glucuronide [D] and [E];  $\alpha$ -zearalenol glucuronide [F] and [G]) excreted to the mucosal side (A, C, E, and G) and transported to the serosal side (B, D, and F).
